# Supplementary material for: Prevalence of Psychotherapy Surrounding Initiation of Psychotropic Polypharmacy in the Medicaid-Insured Population, 1999–2010
Source: Atypon-hosted journal article supplement (doi:10.1176/appi.ps.201600511), 2017-07-03
Supplement: appi.ps.201600511.ds001.pdf [file appi.ps.201600511.ds001.pdf]

**ONLINE SUPPLEMENT**

Appendix Figure 1. Prevalence of behavioral therapy before and after start of polypharmacy across 29 states, 1999-2010

A. Percentage of pediatric patients receiving behavioral therapy prior to starting PMP

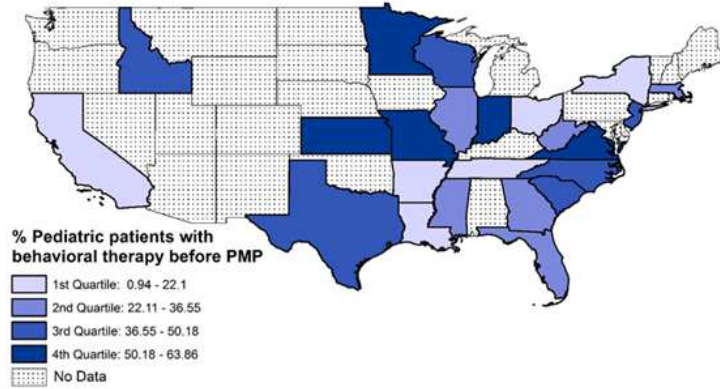

B. Percentage of pediatric patients receiving behavioral therapy after starting PMP

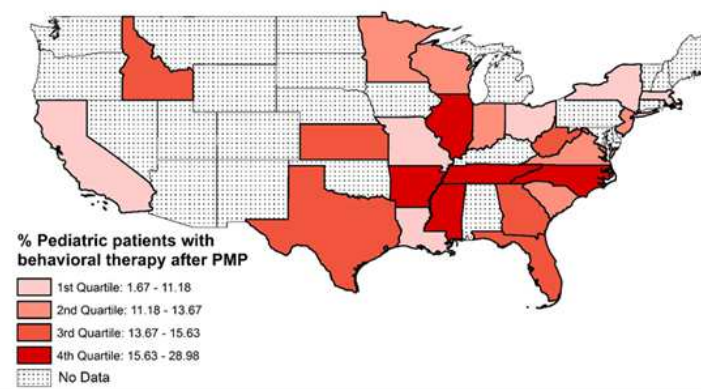

C. Percentage of adult patients receiving behavioral therapy prior to starting PMP

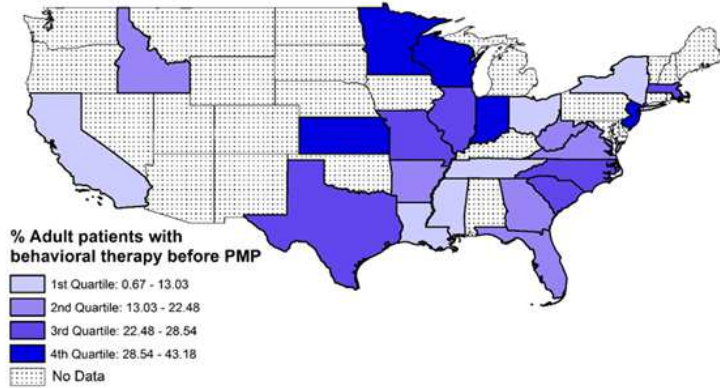

D. Percentage of adult patients receiving behavioral therapy after starting PMP

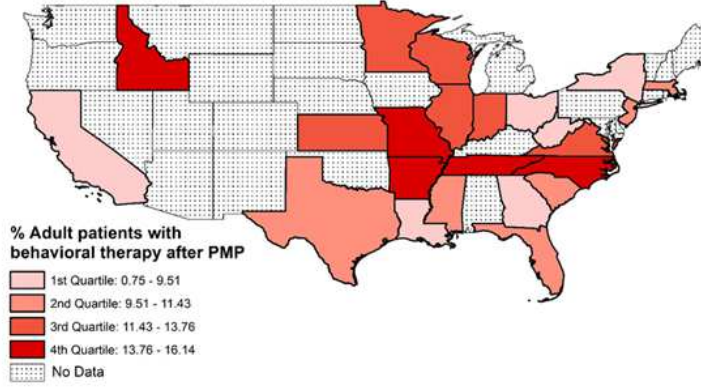

Appendix Table 1. Prevalence of behavioral therapy surrounding polypharmacy in Medicaid patients across 29 states,

1999-2010

| year      | Pediatric patients |                                 |       |                              |       | Adult patients     |                                 |       |                              |       |
|-----------|--------------------|---------------------------------|-------|------------------------------|-------|--------------------|---------------------------------|-------|------------------------------|-------|
|           | Eligible patients* | Behavioral therapy prior to PMP | %     | Behavioral therapy after PMP | %     | Eligible patients* | Behavioral therapy prior to PMP | %     | Behavioral therapy after PMP | %     |
| 1999-2001 | 34,846             | 7,456                           | 21.40 | 8,851                        | 25.40 | 84,107             | 8,794                           | 10.46 | 10,608                       | 12.61 |
| 2000-2002 | 37,349             | 8,386                           | 22.45 | 9,986                        | 26.74 | 85,668             | 8,681                           | 10.13 | 11,506                       | 13.43 |
| 2001-2003 | 42,822             | 9,936                           | 23.20 | 11,650                       | 27.21 | 89,149             | 9,914                           | 11.12 | 12,738                       | 14.29 |
| 2002-2004 | 49,612             | 11,520                          | 23.22 | 18,259                       | 36.80 | 92,541             | 10,526                          | 11.37 | 15,586                       | 16.84 |
| 2003-2005 | 59,886             | 17,802                          | 29.73 | 25,677                       | 42.88 | 110,316            | 13,352                          | 12.10 | 21,239                       | 19.25 |

|               |        |        |           |        |           |        |        |       |        |       |
|---------------|--------|--------|-----------|--------|-----------|--------|--------|-------|--------|-------|
| 2004-200<br>6 | 46,576 | 17,910 | 38.4<br>5 | 20,241 | 43.4<br>6 | 82,403 | 12,744 | 15.47 | 15,598 | 18.93 |
| 2005-200<br>7 | 36,307 | 14,654 | 40.3<br>6 | 15,995 | 44.0<br>5 | 71,075 | 11,551 | 16.25 | 13,545 | 19.06 |
| 2006-200<br>8 | 31,117 | 12,091 | 38.8<br>6 | 12,993 | 41.7<br>6 | 56,211 | 9,369  | 16.67 | 10,235 | 18.21 |
| 2007-200<br>9 | 31,124 | 11,365 | 36.5<br>2 | 12,446 | 39.9<br>9 | 53,656 | 8,317  | 15.50 | 9,534  | 17.77 |
| 2008-201<br>0 | 28,089 | 9,083  | 32.3<br>4 | 10,479 | 37.3<br>1 | 48,079 | 6,216  | 12.93 | 7,559  | 15.72 |

\*Defined as patients (children and adults) with a minimum of 2-years FFS/PCCM eligibility after the first psychotropic drug claim (index date) and start of polypharmacy ( $\geq 2$  concomitant psychotropics) more than 6 months after index date and at least 6 months FFS/PCCM after start of polypharmacy.

Appendix Table 2. Prevalence of behavioral therapy surrounding polypharmacy across 29 states, 1999-2010

| State          | Pediatric patients |                                 |       |                              |       | Adult patients     |                                 |       |                              |       |
|----------------|--------------------|---------------------------------|-------|------------------------------|-------|--------------------|---------------------------------|-------|------------------------------|-------|
|                | Eligible patients* | Behavioral therapy prior to PMP | %     | Behavioral therapy after PMP | %     | Eligible patients* | Behavioral therapy prior to PMP | %     | Behavioral therapy after PMP | %     |
| Arkansas       | 4,872              | 1,077                           | 22.11 | 1,121                        | 23.01 | 2,942              | 413                             | 14.04 | 474                          | 16.11 |
| California     | 13,845             | 130                             | 0.94  | 231                          | 1.67  | 71,084             | 479                             | 0.67  | 530                          | 0.75  |
| Florida        | 10,317             | 2,621                           | 25.40 | 1,533                        | 14.86 | 15,117             | 2,928                           | 19.37 | 1,535                        | 10.15 |
| Georgia        | 10,280             | 3,015                           | 29.33 | 1,495                        | 14.54 | 15,403             | 2,635                           | 17.11 | 1,350                        | 8.76  |
| Idaho          | 2,711              | 1,089                           | 40.17 | 420                          | 15.49 | 2,954              | 664                             | 22.48 | 428                          | 14.49 |
| Illinois       | 15,933             | 5,824                           | 36.55 | 2,722                        | 17.08 | 20,831             | 5,946                           | 28.54 | 2,474                        | 11.88 |
| Indiana        | 7,668              | 4,756                           | 62.02 | 990                          | 12.91 | 13,274             | 5,086                           | 38.32 | 1,827                        | 13.76 |
| Kansas         | 3,180              | 1,919                           | 60.35 | 436                          | 13.71 | 2,917              | 1,225                           | 42.00 | 357                          | 12.24 |
| Louisiana      | 14,555             | 1,461                           | 10.04 | 1,382                        | 9.50  | 18,146             | 1,463                           | 8.06  | 1,002                        | 5.52  |
| Massachusetts  | 1,259              | 319                             | 25.34 | 124                          | 9.85  | 1,893              | 436                             | 23.03 | 208                          | 10.99 |
| Minnesota      | 4,484              | 2,471                           | 55.11 | 547                          | 12.20 | 6,563              | 2,834                           | 43.18 | 808                          | 12.31 |
| Mississippi    | 5,101              | 1,384                           | 27.13 | 876                          | 17.17 | 7,821              | 1,019                           | 13.03 | 794                          | 10.15 |
| Missouri       | 6,754              | 4,313                           | 63.86 | 755                          | 11.18 | 21,286             | 5,699                           | 26.77 | 2,942                        | 13.82 |
| New Jersey     | 1,741              | 758                             | 43.54 | 215                          | 12.35 | 5,544              | 1,775                           | 32.02 | 548                          | 9.88  |
| New York       | 11,984             | 405                             | 3.38  | 282                          | 2.35  | 53,481             | 3,682                           | 6.88  | 2,412                        | 4.51  |
| North Carolina | 14,143             | 7,097                           | 50.18 | 2,336                        | 16.52 | 24,717             | 6,023                           | 24.37 | 3,516                        | 14.23 |
| Ohio           | 15,173             | 1,713                           | 11.29 | 1,010                        | 6.66  | 32,445             | 2,974                           | 9.17  | 2,020                        | 6.23  |
| South Carolina | 7,266              | 3,433                           | 47.25 | 993                          | 13.67 | 9,572              | 2,167                           | 22.64 | 1,068                        | 11.16 |

|               |        |        |       |       |       |        |       |       |       |       |
|---------------|--------|--------|-------|-------|-------|--------|-------|-------|-------|-------|
| Tennessee     | 5,052  | 796    | 15.76 | 1,464 | 28.98 | 18,921 | 1,316 | 6.96  | 3,054 | 16.14 |
| Texas         | 23,332 | 11,489 | 49.24 | 3,646 | 15.63 | 22,940 | 5,785 | 25.22 | 2,622 | 11.43 |
| Virginia      | 4,764  | 2,620  | 55.00 | 590   | 12.38 | 6,891  | 1,549 | 22.48 | 794   | 11.52 |
| West Virginia | 3,437  | 891    | 25.92 | 483   | 14.05 | 11,915 | 1,738 | 14.59 | 1,133 | 9.51  |
| Wisconsin     | 5,991  | 2,654  | 44.30 | 816   | 13.62 | 7,503  | 2,239 | 29.84 | 945   | 12.59 |

\*Defined as patients (children and adults) with a minimum of 2-years FFS/PCCM enrollment after the first psychotropic drug claim (index date) and start of polypharmacy (≥2 concomitant psychotropics) more than 6 months after index date and at least 6 months enrollment after start of polypharmacy.

## Appendix

### List of Codes for Psychotherapy

| CPT   |                                                                                                                                                                                                                                                                                                          |
|-------|----------------------------------------------------------------------------------------------------------------------------------------------------------------------------------------------------------------------------------------------------------------------------------------------------------|
| 90804 | Individual psychotherapy, insight oriented, behavior modifying and/or supportive, in an office or outpatient facility, approximately 20 to 30 minutes face-to-face with the patient                                                                                                                      |
| 90805 | Individual psychotherapy, insight oriented, behavior modifying and/or supportive, in an office or outpatient facility, approximately 20 to 30 minutes face-to-face with the patient; with medical evaluation and management services                                                                     |
| 90806 | Individual psychotherapy, insight oriented, behavior modifying and/or supportive, in an office or outpatient facility, approximately 45 to 50 minutes face-to-face with the patient                                                                                                                      |
| 90807 | Individual psychotherapy, insight oriented, behavior modifying and/or supportive, in an office or outpatient facility, approximately 45 to 50 minutes face-to-face with the patient; with medical evaluation and management services                                                                     |
| 90808 | Individual psychotherapy, insight oriented, behavior modifying and/or supportive, in an office or outpatient facility, approximately 75 to 80 minutes face-to-face with the patient                                                                                                                      |
| 90809 | Individual psychotherapy, insight oriented, behavior modifying and/or supportive, in an office or outpatient facility, approximately 75 to 80 minutes face-to-face with the patient; with medical evaluation and management services                                                                     |
| 90810 | Individual psychotherapy, interactive, using play equipment, physical devices, language interpreter, or other mechanisms of non-verbal communication, in an office or outpatient facility, approximately 20 to 30 minutes face-to-face with the patient                                                  |
| 90811 | Individual psychotherapy, interactive, using play equipment, physical devices, language interpreter, or other mechanisms of non-verbal communication, in an office or outpatient facility, approximately 20 to 30 minutes face-to-face with the patient; with medical evaluation and management services |
| 90812 | Individual psychotherapy, interactive, using play equipment, physical devices, language interpreter, or other mechanisms of non-verbal communication, in an office or outpatient facility, approximately 45 to 50 minutes face-to-face with the patient                                                  |
| 90813 | Individual psychotherapy, interactive, using play equipment, physical devices, language interpreter, or other mechanisms of non-verbal communication, in an office or outpatient facility, approximately 45 to 50 minutes face-to-face with the patient; with medical evaluation and                     |

|       |                                                                                                                                                                                                                                                                                                                                             |
|-------|---------------------------------------------------------------------------------------------------------------------------------------------------------------------------------------------------------------------------------------------------------------------------------------------------------------------------------------------|
|       | management services                                                                                                                                                                                                                                                                                                                         |
| 90814 | Individual psychotherapy, interactive, using play equipment, physical devices, language interpreter, or other mechanisms of non-verbal communication, in an office or outpatient facility, approximately 75 to 80 minutes face-to-face with the patient                                                                                     |
| 90815 | Individual psychotherapy, interactive, using play equipment, physical devices, language interpreter, or other mechanisms of non-verbal communication, in an office or outpatient facility, approximately 75 to 80 minutes face-to-face with the patient; with medical evaluation and management services                                    |
| 90816 | Individual psychotherapy, insight oriented, behavior modifying and/or supportive, in an inpatient hospital, partial hospital or residential care setting, approximately 20 to 30 minutes face-to-face with the patient                                                                                                                      |
| 90817 | Individual psychotherapy, insight oriented, behavior modifying and/or supportive, in an inpatient hospital, partial hospital or residential care setting, approximately 20 to 30 minutes face-to-face with the patient; with medical evaluation and management services                                                                     |
| 90818 | Individual psychotherapy, insight oriented, behavior modifying and/or supportive, in an inpatient hospital, partial hospital or residential care setting, approximately 45 to 50 minutes face-to-face with the patient                                                                                                                      |
| 90819 | Individual psychotherapy, insight oriented, behavior modifying and/or supportive, in an inpatient hospital, partial hospital or residential care setting, approximately 45 to 50 minutes face-to-face with the patient; with medical evaluation and management services                                                                     |
| 90821 | Individual psychotherapy, insight oriented, behavior modifying and/or supportive, in an inpatient hospital, partial hospital or residential care setting, approximately 75 to 80 minutes face-to-face with the patient                                                                                                                      |
| 90822 | Individual psychotherapy, insight oriented, behavior modifying and/or supportive, in an inpatient hospital, partial hospital or residential care setting, approximately 75 to 80 minutes face-to-face with the patient; with medical evaluation and management services                                                                     |
| 90823 | Individual psychotherapy, interactive, using play equipment, physical devices, language interpreter, or other mechanisms of non-verbal communication, in an inpatient hospital, partial hospital or residential care setting, approximately 20 to 30 minutes face-to-face with the patient                                                  |
| 90824 | Individual psychotherapy, interactive, using play equipment, physical devices, language interpreter, or other mechanisms of non-verbal communication, in an inpatient hospital, partial hospital or residential care setting, approximately 20 to 30 minutes face-to-face with the patient; with medical evaluation and management services |
| 90826 | Individual psychotherapy, interactive, using play equipment, physical devices, language interpreter, or other mechanisms of non-verbal communication, in an inpatient hospital, partial hospital or residential care setting, approximately 45 to 50 minutes face-to-face with the patient                                                  |
| 90827 | Individual psychotherapy, interactive, using play equipment, physical devices, language interpreter, or other mechanisms of non-verbal communication, in an inpatient hospital, partial hospital or residential care setting, approximately 45 to 50 minutes face-to-face with the patient; with medical evaluation and management services |
| 90828 | Individual psychotherapy, interactive, using play equipment, physical devices, language interpreter, or other mechanisms of non-verbal communication, in an inpatient hospital, partial hospital or residential care setting, approximately 75 to 80 minutes face-to-face with the patient                                                  |
| 90829 | Individual psychotherapy, interactive, using play equipment, physical devices, language interpreter, or other mechanisms of non-verbal communication, in an inpatient hospital, partial hospital or residential care setting, approximately 75 to 80 minutes face-to-face with the patient; with medical evaluation and management services |
| 90857 | Interactive group psychotherapy                                                                                                                                                                                                                                                                                                             |
| 90832 | Psychotherapy, 30 minutes with patient and/or family member                                                                                                                                                                                                                                                                                 |

|            |                                                                                                                                                                                         |
|------------|-----------------------------------------------------------------------------------------------------------------------------------------------------------------------------------------|
| 90833      | Psychotherapy, 30 minutes with patient and/or family member when performed with an evaluation and management service                                                                    |
| 90834      | Psychotherapy, 45 minutes with patient and/or family member                                                                                                                             |
| 90836      | Psychotherapy, 45 minutes with patient and/or family member when performed with an evaluation and management service                                                                    |
| 90837      | Psychotherapy, 60 minutes with patient and/or family member                                                                                                                             |
| 90838      | Psychotherapy, 60 minutes with patient and/or family member when performed with an evaluation and management service                                                                    |
| 90839      | Psychotherapy for crisis; first 60 minutes                                                                                                                                              |
| 90840      | Psychotherapy for crisis; each additional 30 minutes                                                                                                                                    |
| 90846      | Family psychotherapy (without the patient present)                                                                                                                                      |
| 90847      | Family psychotherapy (conjoint psychotherapy) (with patient present)                                                                                                                    |
| 90849      | Multiple-family group psychotherapy                                                                                                                                                     |
| 90853      | Group Psychotherapy (other than of a multiple-family group)                                                                                                                             |
| 90863      | Pharmacologic management, including prescription and review of medication, when performed with psychotherapy services                                                                   |
| 90875      | Individual psychophysiological therapy incorporating biofeedback training by any modality, with psychotherapy; 30 minutes                                                               |
| 90876      | Individual psychophysiological therapy incorporating biofeedback training by any modality, with psychotherapy; 45 minutes                                                               |
| 4050F      | Patient referral for psychotherapy documented                                                                                                                                           |
| 4060F      | Psychotherapy services provided                                                                                                                                                         |
|            |                                                                                                                                                                                         |
| H<br>CODES |                                                                                                                                                                                         |
| H0004      | Behavioral health counseling and therapy, per 15 minutes                                                                                                                                |
| H0017      | Behavioral health; residential (hospital residential treatment program), without room and board, per diem                                                                               |
| H0018      | Behavioral health; short-term residential (non-hospital residential treatment program), without room and board, per diem                                                                |
| H0019      | Behavioral health; long-term residential (non-medical, non-acute care in a residential treatment program where stay is typically longer than 30 days), without room and board, per diem |
| H0036      | Community psychiatric supportive treatment, face-to-face, per 15 minutes                                                                                                                |
| H0037      | Community psychiatric supportive treatment program, per diem                                                                                                                            |
| H0038      | Self-help/peer services, per 15 minutes                                                                                                                                                 |
| H0039      | Assertive community treatment, face-to-face, per 15 minutes                                                                                                                             |
| H0040      | Assertive community treatment program, per diem                                                                                                                                         |
| H0046      | Mental health services, not otherwise specified                                                                                                                                         |
| H2012      | Behavioral health day treatment, per hour                                                                                                                                               |



|       |                                                      |
|-------|------------------------------------------------------|
| H2013 | Psychiatric health facility service, per diem        |
| H2017 | Psychosocial rehabilitation services, per 15 minutes |
| H2018 | Psychosocial rehabilitation services, per diem       |
| H2019 | Therapeutic behavioral services, per 15 minutes      |
| H2020 | Therapeutic behavioral services, per diem            |
